# Supplementary material for: Bi2O3/nylon multilayered nanocomposite membrane for the photocatalytic inactivation of waterborne pathogens and degradation of mixed organic pollutants
Source: Royal Society of Chemistry journal article supplement (doi:10.1039/d0en01026j), 2020-12-17
Supplement: d0en01026j1.pdf [file d0en01026j1.pdf]

## Supplementary Information

### **Bi<sub>2</sub>O<sub>3</sub>/Nylon multilayered nanocomposite membrane for the photocatalytic inactivation of waterborne pathogens and degradation of mixed organic pollutants**

**Tanveer A. Gadhi<sup>1</sup>, Aizaz Qureshi<sup>1</sup>, Najeebullah Channa<sup>1</sup>, Rasool Bux Mahar<sup>1</sup>, Alessandro Chiadò<sup>2\*</sup>, Chiara Novara<sup>2</sup>, Alberto Tagliaferro<sup>2</sup>**

<sup>1</sup>U.S. Pakistan Center for Advanced Studies in Water (USPCASW), Mehran, University of Engineering and Technology, Jamshoro 76062, Pakistan.

<sup>2</sup>Department of Applied Science and Technology, Politecnico di Torino, Corso Duca degli Abruzzi 24, 10129 Torino, Italy.

\*Corresponding Authors Email: [alessandro.chiado@polito.it](mailto:alessandro.chiado@polito.it)

**Table S1 FT-IR band assignments of Nylon-6.**

| Wavenumbers (cm <sup>-1</sup> ) | IR Assignments                                                                   | Reference |
|---------------------------------|----------------------------------------------------------------------------------|-----------|
| 3297                            | -NH stretching                                                                   | [1-3]     |
| 3084                            | -CH stretching (asym);<br>-NH Fermi resonance;                                   | [1-3]     |
| 2936                            | -CH <sub>2</sub> asymmetric stretching<br>vibrations in polyamide backbone;      | [2, 3]    |
| 2860                            | -CH <sub>2</sub> symmetric stretching vibrations<br>in polyamide backbone;       | [1,3]     |
| 1638                            | Amide I stretching (C=O stretching);                                             | [1-4]     |
| 1540                            | Amide II stretching (as a<br>combination of -CN stretching and -<br>NH bending); | [1-3]     |
| 1461                            | -NH deformation;<br>-CH <sub>2</sub> scissoring;                                 | [3]       |
| 1370                            | Amide III stretching + -CH <sub>2</sub><br>wagging;                              | [2,3]     |
| 1296                            | -CH <sub>2</sub> wagging/twisting;                                               | [3]       |
| 1262                            | Amide III stretching + -CH <sub>2</sub><br>wagging;                              | [1,2]     |
| 1236                            | -CH <sub>2</sub> wagging/twisting;                                               | [2]       |
| 1200                            | -CCH bending (sym);<br>-CH <sub>2</sub> twisting/twisting;<br>Amide III;         | [1,2,4]   |
| 1170                            | CO-NH skeletal motion                                                            | [2,4]     |
| 1121                            | C-C stretching (sym) (amorphous<br>phase)                                        | [2,4]     |
| 972                             | CO-NH in plane ( $\gamma$ )                                                      | [2,3,4]   |
| 930                             | CO-NH in plane ( $\alpha$ )                                                      | [2,4]     |

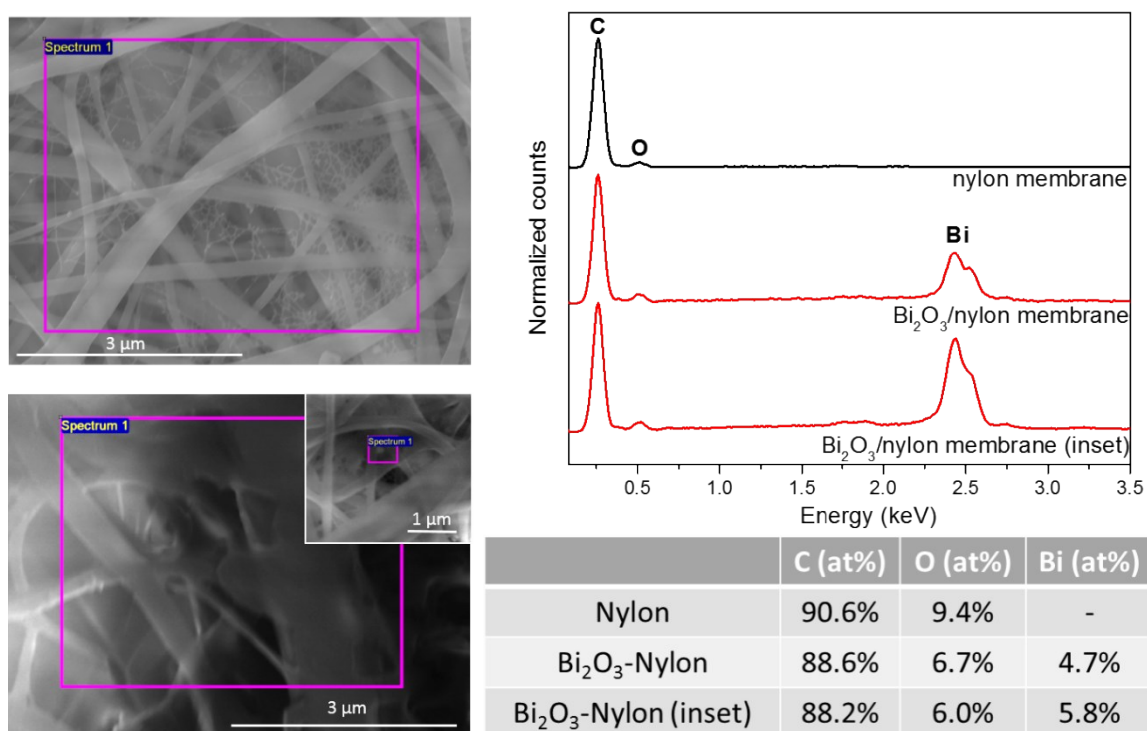

Fig. S1 EDX spectra of A) bare Nylon and B) Bi<sub>2</sub>O<sub>3</sub>/Nylon multilayered membranes.

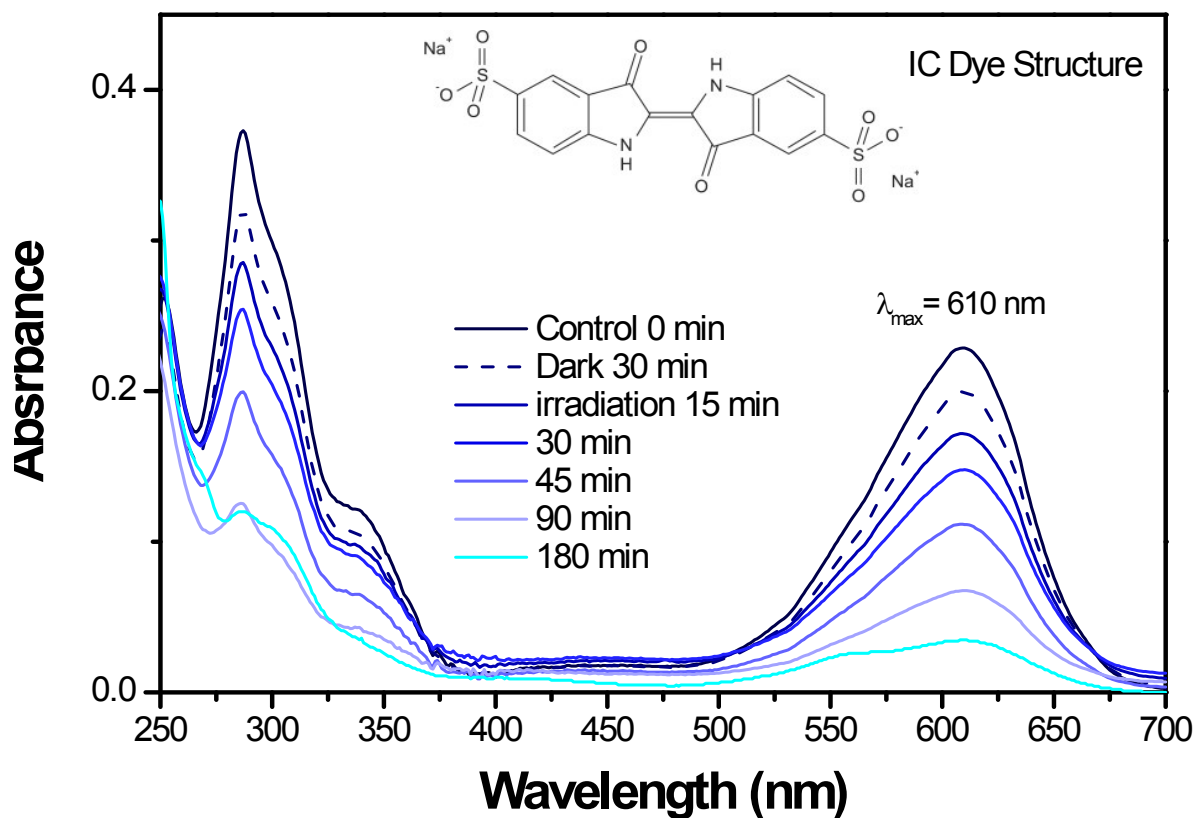

Fig. S2 Absorbance spectra of the IC dye removal using Bi<sub>2</sub>O<sub>3</sub>/Nylon composite under LED lamp.

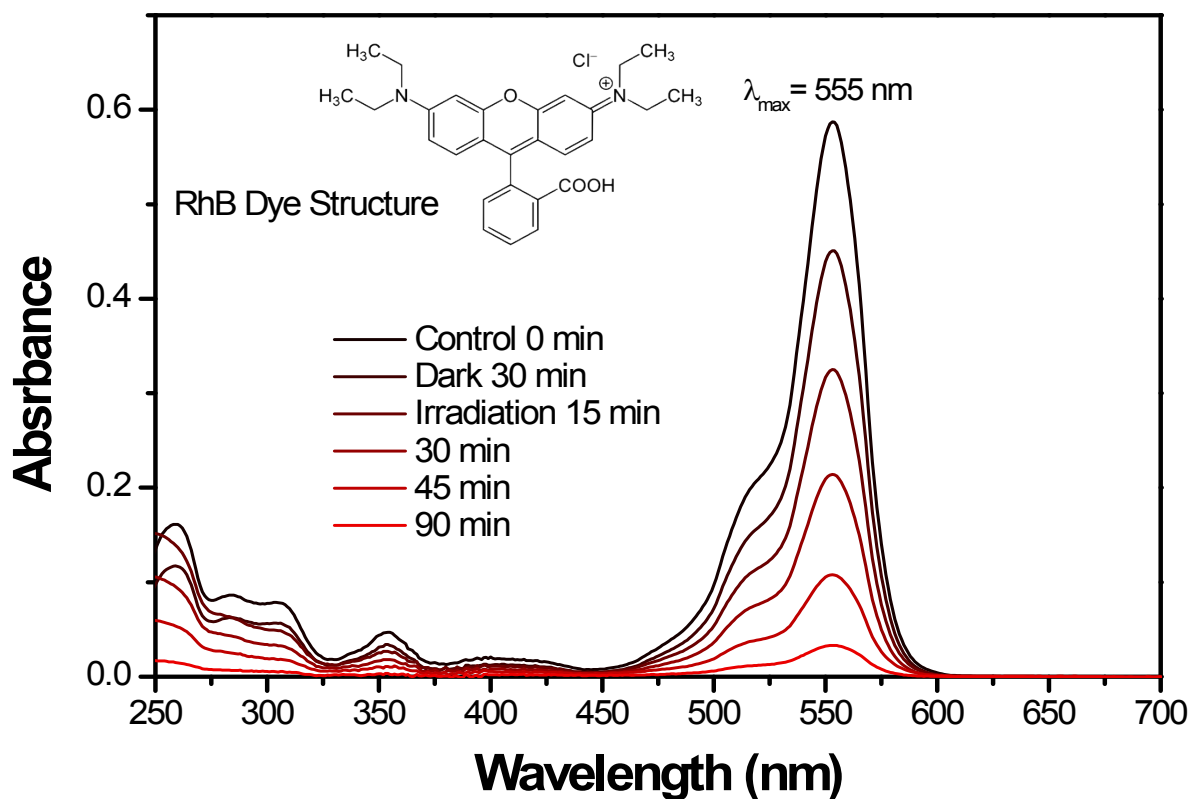

Fig. S3 Absorbance spectra of the IC dye removal using  $\text{Bi}_2\text{O}_3/\text{Nylon}$  composite under LED lamp.

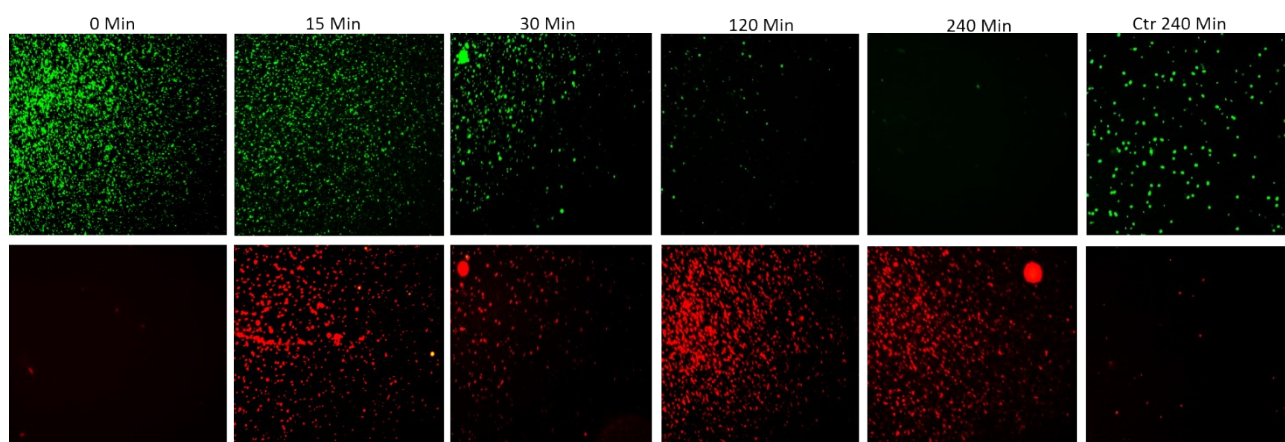

Figure. S4. Acquired separate live and dead fluorescence stained images of *E. coli* cells using  $\text{Bi}_2\text{O}_3/\text{Nylon}$

## References

1. Fatarella, E., et al., *Nylon 6 film and nanofiber carriers: Preparation and laccase immobilization performance*. Journal of Molecular Catalysis B: Enzymatic, 2014. **102**: p. 41-47.
2. Lee, K.-H., et al., *Polarized FT-IR study of macroscopically oriented electrospun nylon-6 nanofibers*. Macromolecules, 2008. **41**(4): p. 1494-1498.

3. Pant, H.R., et al., *Effect of lactic acid on polymer crystallization chain conformation and fiber morphology in an electrospun nylon-6 mat*. Polymer, 2011. **52**(21): p. 4851-4856.
4. Vasanthan, N., *Determination of molecular orientation of uniaxially stretched polyamide fibers by polarized infrared spectroscopy: comparison of X-ray diffraction and birefringence methods*. Applied spectroscopy, 2005. **59**(7): p. 897-903.
